# Supplementary material
Source: publisher site journal article supplement (https://www.dovepress.com/article/577731)
Supplement: Supplementary file 1 [file 577731_Supplementary%20Material.docx]

**SUPPLEMENTARY MATERIAL**

**Table S1. First analysis (population level, by** **Spanish regions).** Current situation (part of the patients with KOA are treated with CS/CS+GLU and part are treated with NSAIDs/COXIBs) compared to a hypothetical situation in which all patients with KOA currently treated with CS/CS+GLU would be treated with NSAIDs/COXIBS. Estimated savings (€) of GIAE, IHD, AKI, CKF and IS with CS/CS+GLU treatment, additional costs with CS/CS+GLU and net savings with CS/CS+GLU. Treatment duration: 180 days.

| **Region** | **Savings from avoiding adverse effects (€) with CS/CS+GLU treatment** | | | | **Additional cost with CS/CS+GLU treatment (€)** | | | | **Net savings with CS/CS+GLU (€)** | | | |
| --- | --- | --- | --- | --- | --- | --- | --- | --- | --- | --- | --- | --- |
| **2025** | **2026** | **2027** | **Total** | **2025** | **2026** | **2027** | **Total** | **2025** | **2026** | **2027** | Total* |
| Andalusia | 3,436,342 | 3,575,519 | 3,609,031 | 10,620,892 | 826,022 | 842,542 | 859,393 | 2,527,957 | -2,610,321 | -2,732,977 | -2,749,638 | -8,092,936 |
| Aragon | 992,193 | 1,018,826 | 1,001,191 | 3,012,210 | 241,625 | 246,457 | 251,386 | 793,468 | -750,569 | -772,369 | -749,804 | -2,272,742 |
| Asturias (Principality of) | 785,216 | 802,072 | 804,340 | 2,391,628 | 186,495 | 190,225 | 194,029 | 570,749 | -598,721 | -611,847 | -610,311 | -1,820,879 |
| Balearic Islands | 838,724 | 871,258 | 873,658 | 2,583,641 | 208,485 | 212,655 | 216,908 | 638,047 | -630,239 | -658,603 | -656,750 | -1,945,593 |
| Canary Islands | 1,699,313 | 1,758,536 | 1,749,685 | 5,207,534 | 439,253 | 448,038 | 456,999 | 1,344,291 | -1,260,060 | -1,310,497 | -1,292,686 | -3,863,243 |
| Cantabria | 412,028 | 423,522 | 445,197 | 1,280,746 | 97,281 | 99,227 | 101,211 | 297,719 | -314,747 | -324,295 | -343,985 | -983,027 |
| Castile and Leon | 2,342,680 | 2,395,267 | 2,395,896 | 7,133,843 | 556,148 | 567,271 | 578,617 | 1,702,036 | -1,786,531 | -1,827,996 | -1,817,279 | -5,431,807 |
| Castile-La Mancha | 1,181,843 | 1,221,585 | 1,254,067 | 3,657,495 | 292,298 | 298,144 | 304,107 | 894,548 | -889,545 | -923,441 | -949,961 | -2,762,947 |
| Catalonia | 1,375,480 | 1,472,857 | 1,657,406 | 4,505,743 | 300,942 | 306,961 | 313,100 | 921,003 | -1,074,538 | -1,165,896 | -1,344,306 | -3,584,740 |
| Valencian Community | 3,468,507 | 3,604,618 | 3,557,712 | 10,630,836 | 901,235 | 919,260 | 937,645 | 2,758,140 | -2,567,271 | -2,685,358 | -2,620,066 | -7,872,696 |
| Extremadura | 1,200,494 | 1,227,037 | 1,235,753 | 3,663,284 | 276,411 | 281,939 | 287,578 | 845,927 | -924,083 | -945,098 | -948,175 | -2,817,356 |
| Galicia | 1,135,055 | 1,165,933 | 1,205,142 | 3,506,130 | 268,677 | 274,050 | 279,531 | 822,258 | -866,378 | -891,883 | -925,611 | -2,683,872 |
| Madrid (Community of) | 2,274,226 | 2,378,995 | 2,360,040 | 7,013,261 | 616,880 | 629,217 | 641,802 | 1,887,898 | -1,657,346 | -1,749,778 | -1,718,239 | -5,125,363 |
| Murcia (Region of) | 1,953,568 | 2,006,584 | 2,037,905 | 5,998,057 | 534,535 | 545,226 | 556,130 | 1,635,891 | -1,419,033 | -1,461,359 | -1,481,775 | -4,362,166 |
| Navarra (Autonomous Community of) | 224,288 | 233,126 | 234,968 | 692,382 | 52,863 | 53,920 | 54,999 | 161,282 | -171,425 | -179,206 | -179,970 | -530,600 |
| Basque Country | 532,332 | 548,561 | 541,550 | 1,622,443 | 119,702 | 122,096 | 124,538 | 366,336 | -412,630 | -426,464 | -417,012 | -1,256,106 |
| Rioja (La) | 108,445 | 112,700 | 116,401 | 337,547 | 28,638 | 29,211 | 29,795 | 87,644 | -79,807 | -83,489 | -86,606 | -249,902 |

AKI: acute kidney injury; CKF: chronic kidney failure; CS/CS+GLU: chondroitin sulphate with or without glucosamine; GIAE: gastrointestinal adverse effects; IHD: ischemic heart disease; IS: ischemic stroke.

*The economic impact of CS/CS+GLU treatment is not directly related to the population of each region, but to the frequency of CS/CS+GLU use in each region.

**Table S2. Second analysis (population level, by** **Spanish regions)** (if all patients with KOA currently under treatment with NSAIDs/COXIBs were treated with CS/CS+GLU)**.** Estimated net savings (€) with CS/CS+GLU. Treatment duration: 180 days.

| **Region** | **Net savings with CS/CS+GLU (€)** | | | |
| --- | --- | --- | --- | --- |
| **2025** | **2026** | **2027** | **Total*** |
| Andalusia | -17,710,949 | -18,025,145 | -18,240,384 | -53,976,478 |
| Aragon | -5,212,304 | -5,304,772 | -5,368,116 | -15,885,193 |
| Asturias (Principality of) | -4,118,003 | -4,191,057 | -4,241,103 | -12,550,163 |
| Balearic Islands | -4,245,930 | -4,321,254 | -4,372,854 | -12,940,038 |
| Canary Islands | -8,946,231 | -9,104,939 | -9,213,661 | -27,264,831 |
| Cantabria | -2,160,743 | -2,199,075 | -2,225,335 | -6,585,154 |
| Castile and Leon | -12,207,680 | -12,424,247 | -12,572,605 | -37,204,531 |
| Castile-La Mancha | -6,329,314 | -6,441,597 | -6,518,516 | -19,289,427 |
| Catalonia | -6,604,711 | -6,721,880 | -6,802,146 | -20,128,737 |
| Valencian Community | -19,372,312 | -19,715,981 | -19,951,410 | -59,039,703 |
| Extremadura | -6,101,687 | -6,209,932 | -6,284,085 | -18,595,704 |
| Galicia | -5,927,829 | -6,032,990 | -6,105,030 | -18,065,850 |
| Madrid (Community of) | -13,018,119 | -13,249,064 | -13,407,271 | -39,674,454 |
| Murcia (Region of) | -10,554,156 | -10,741,389 | -10,869,652 | -32,165,196 |
| Navarra (Autonomous Community of) | -1,197,056 | -1,218,292 | -1,232,839 | -3,648,187 |
| Basque Country | -2,679,556 | -2,727,092 | -2,759,656 | -8,166,304 |
| Rioja (La) | -637,355 | -648,662 | -656,408 | -1,942,425 |

AKI: acute kidney injury; CKF: chronic kidney failure; CS/CS+GLU: chondroitin sulphate with or without glucosamine; GIAE: gastrointestinal adverse effects; IHD: ischemic heart disease; IS: ischemic stroke.

*The economic impact of CS/CS+GLU treatment is not directly related to the population of each region, but to the frequency of CS/CS+GLU use in each region.

.

**Table S3. Cost-effectiveness of Chondroitin Sulphate (with or without Glucosamine) Prescription in the Treatment of Knee Osteoarthritis Compared to NSAIDs and COXIBs.**

CHEERS checklist—Items to include when reporting economic evaluations of health interventions

Section/item Item

No

Recommendation Reported on

page No/ line No

Title and abstract

Title 1 Identify the study as an economic evaluation or use more specific terms such

as ‘‘cost-effectiveness analysis’’, and describe the interventions compared. 1/6-8

Abstract 2 Provide a structured summary of objectives, perspective, setting, methods (including study design and inputs), results (including base case and

uncertainty analyses), and conclusions. 2/34-61

Introduction

Background and objectives 3 Provide an explicit statement of the broader context for the study.

Present the study question and its relevance for health policy or practice

decisions. 3-4/66-103

Methods

Target population and subgroups 4 Describe characteristics of the base case population and subgroups analysed,

including why they were chosen. 5/127-141

Setting and location 5 State relevant aspects of the system(s) in which the decision(s) need(s) to be

made. 5/127-141

Study perspective 6 Describe the perspective of the study and relate this to the costs being

evaluated. 6/145-147

Comparators 7 Describe the interventions or strategies being compared and state why they

were chosen. 4/105-126

Time horizon 8 State the time horizon(s) over which costs and consequences are being

evaluated and say why appropriate. 6/142-144

Discount rate 9 Report the choice of discount rate(s) used for costs and outcomes and say

why appropriate. No Applic.

Choice of health outcomes 10 Describe what outcomes were used as the measure(s) of benefit in the

evaluation and their relevance for the type of analysis performed. 6/151-180

Measurement of effectiveness 11a *Single study-based estimates:* Describe fully the design features of the single

effectiveness study and why the single study was a sufficient source of

clinical effectiveness data. No Applic.

11b *Synthesis-based estimates:* Describe fully the methods used for identification

of included studies and synthesis of clinical effectiveness data. No Applic.

Measurement and valuation of preference based outcomes

12 If applicable, describe the population and methods used to elicit preferences

for outcomes. No Applic.

Estimating resources and costs 13a *Single study-based economic evaluation:* Describe approaches used to

estimate resource use associated with the alternative interventions. Describe primary or secondary research methods for valuing each resource item in terms of its unit cost. Describe any adjustments made to

approximate to opportunity costs. No Applic.

13b *Model-based economic evaluation:* Describe approaches and data sources used to estimate resource use associated with model health states. Describe primary or secondary research methods for valuing each resource item in terms of its unit cost. Describe any adjustments made to approximate to

opportunity costs. 4/105-126

Currency, price date, and conversion 14 Report the dates of the estimated resource quantities and unit costs. Describe

methods for adjusting estimated unit costs to the year of reported costs if necessary. Describe methods for converting costs into a common currency

base and the exchange rate. 6/147-150

Choice of model 15 Describe and give reasons for the specific type of decision-analytical model

used. Providing a figure to show model structure is strongly recommended. 4/105-126

Assumptions 16 Describe all structural or other assumptions underpinning the decision- 4-6/105-

analytical model. 209

Analytical methods 17 Describe all analytical methods supporting the evaluation. This could include

methods for dealing with skewed, missing, or censored data; extrapolation methods; methods for pooling data; approaches to validate or make adjustments (such as half cycle corrections) to a model; and methods for

handling population heterogeneity and uncertainty. 4/105-126

Results

Study parameters 18 Report the values, ranges, references, and, if used, probability distributions

|  | | for all parameters. Report reasons or sources for distributions used to  represent uncertainty where appropriate. Providing a table to show the input values is strongly recommended. | 8-9/210-240 |
| --- | --- | --- | --- |
| Incremental costs and outcomes | 19 | For each intervention, report mean values for the main categories of estimated costs and outcomes of interest, as well as mean differences between the comparator groups. If applicable, report incremental cost- effectiveness ratios. | 8-9/210-240 |
| Characterising uncertainty | 20a | *Single study-based economic evaluation:* Describe the effects of sampling uncertainty for the estimated incremental cost and incremental effectiveness parameters, together with the impact of methodological assumptions (such as discount rate, study perspective). | No Applic. |
|  | 20b | *Model-based economic evaluation:* Describe the effects on the results of uncertainty for all input parameters, and uncertainty related to the structure of the model and assumptions. | 8-9/210-240 |

Characterising heterogeneity 21 If applicable, report differences in costs, outcomes, or cost-effectiveness that

can be explained by variations between subgroups of patients with different baseline characteristics or other observed variability in effects that are not

reducible by more information. 8-9/210-240

Discussion

Study findings, limitations, generalisability, and current knowledge

Other

22 Summarise key study findings and describe how they support the conclusions reached. Discuss limitations and the generalisability of the findings and

how the findings fit with current knowledge. 10-12/241-290

Source of funding 23 Describe how the study was funded and the role of the funder in the

identification, design, conduct, and reporting of the analysis. Describe other

non-monetary sources of support. See Title page

Conflicts of interest 24 Describe any potential for conflict of interest of study contributors in

accordance with journal policy. In the absence of a journal policy, we recommend authors comply with International Committee of Medical

Journal Editors recommendations. See Title page

For consistency, the CHEERS statement checklist format is based on the format of the CONSORT statement checklist.
